# Supplementary material for: Inclusion complexation and self-association of cucurbit[n]uril (n = 6, 7) and diquat under pseudo-physiological conditions
Source: Royal Society of Chemistry journal article supplement (doi:10.1039/d1nj06170d), 2022-01-01
Supplement: d1nj06170d1.pdf [file d1nj06170d1.pdf]

## Supporting Information

### Inclusion Complexation and Self-association of Cucurbit[*n*]uril (*n* = 6, 7) and Diquat under Pseudo-physiological Conditions

Hiroyuki Tsutsumi,\* Tomonori Ohata, Rie Nakashima, Hirohito Ikeda

*Faculty of Pharmaceutical Sciences, Fukuoka University; 8-19-1 Nanakuma, Jonan-ku, Fukuoka-shi, Fukuoka, 814-0180, Japan*

\*To whom correspondence should be addressed. E-mail: [h-tsutsumi@fukuoka-u.ac.jp](mailto:h-tsutsumi@fukuoka-u.ac.jp)

## Table of Contents

Fig. S1 qNMR spectra of CB[6].

Fig. S2 qNMR spectra of CB[7].

Fig. S3 Continuous variation plot (Job's plot) by using  $^1\text{H}$  NMR measurement.

Fig. S4 Regression analysis based on  $\Delta\delta_{\text{obs}}$  of the  $\text{H}^4$  proton signal of DQ (0.5 mM DQ) at 30 - 65 °C in pD1.2.

Fig. S5 Van't Hoff plots for the inclusion complexation between CB[7] and DQ (0.5 mM DQ) in pD1.2.

Fig. S6 Regression analysis based on  $\Delta\delta_{\text{obs}}$  of the  $\text{H}^4$  proton signal of DQ (0.5 mM DQ) at 30 - 65 °C in pD7.4.

Fig. S7 Van't Hoff plots for the inclusion complexation between CB[7] and DQ (0.5 mM DQ) in pD7.4.

Fig. S8 Regression analysis based on  $\Delta\delta_{\text{obs}}$  of the  $\text{H}^4$  proton signal of DQ (0.5 mM DQ) at 30 - 65 °C in NaCl- $\text{D}_2\text{O}$ .

Fig. S9 Van't Hoff plots for the inclusion complexation between CB[7] and DQ (0.5 mM DQ) in NaCl- $\text{D}_2\text{O}$ .

Fig. S10 Regression analysis by using Benesi-Hildebrand method.

Fig. S11 Regression analysis based on  $\Delta\delta_{\text{obs}}$  of the  $\text{H}^4$  proton signal of DQ (1 mM DQ) at 30 - 65 °C in NaCl- $\text{D}_2\text{O}$ .

Fig. S12 Van't Hoff plots for the inclusion complexation between CB[7] and DQ (1 mM DQ) in NaCl- $\text{D}_2\text{O}$ .

Fig. S13 Behavior of CB[7] or DQ, as revealed via  $^1\text{H}$  NMR when increasing the CB[7] or DQ concentrations in pD1.2, pD7.4, and NaCl- $\text{D}_2\text{O}$ .

Fig. S14 Rotating-frame Overhauser effect (ROE) observed between CB[7] and DQ when forming the inclusion complex in pD7.4.

Fig. S15 ROE observed between CB[7] and DQ when forming the inclusion complex in NaCl- $\text{D}_2\text{O}$ .

qNMR spectra were recorded over a spectral width of 12000 Hz using 8 scans without spinning. The pulse angle is  $90^\circ$ , and the repetition time is 64 s. DSS- $d_6$  (FUJIFILM Wako Chemicals Co) is used as an internal reference in qNMR. CB[6] or CB[7] were dissolved in NaCl-D $_2$ O. Purities of CB[6] or CB[7] were calculated using integrated values of the methyl proton signal of the trimethylsilyl group of DSS- $d_6$  (Si-CH $_3$ ) and the H<sup>a</sup> and H<sup>c</sup> proton signals of CB[6] or CB[7]. In the case of CB[7], although DSS- $d_6$  forms the complex with CB[7], the integration value of Si-CH $_3$  did not affect on the quantitative (-0.744 ppm). Purities of CB[6] or CB[7] were 82.9 % and 87.2 %, respectively.

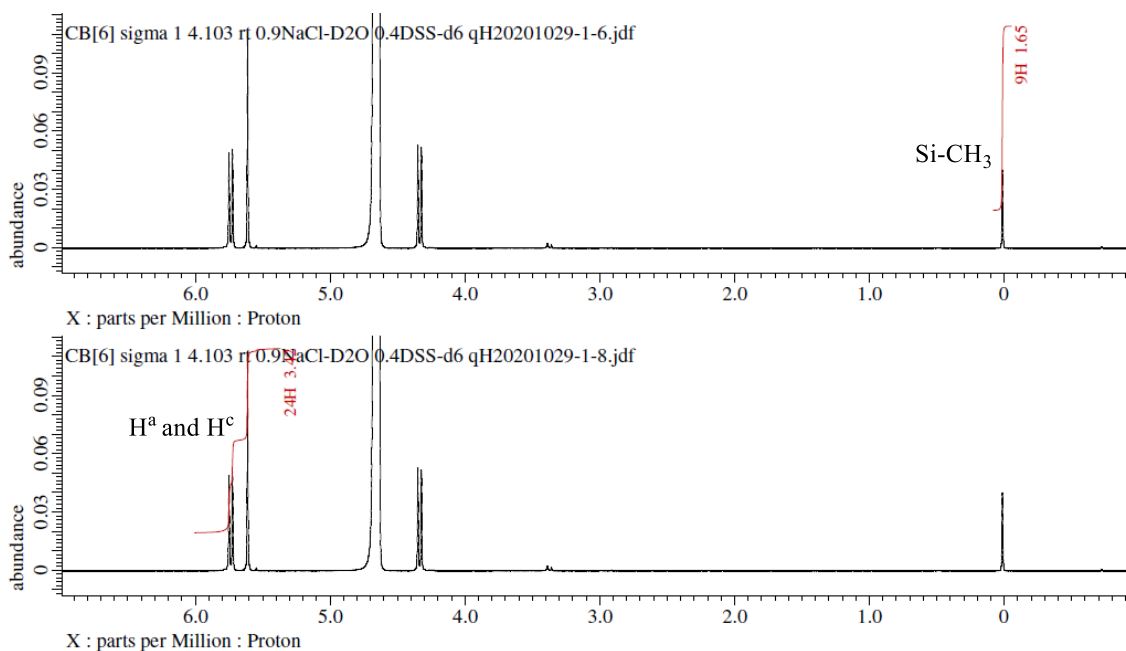

Fig. S1  $^1\text{H}$  qNMR spectra of CB[6].

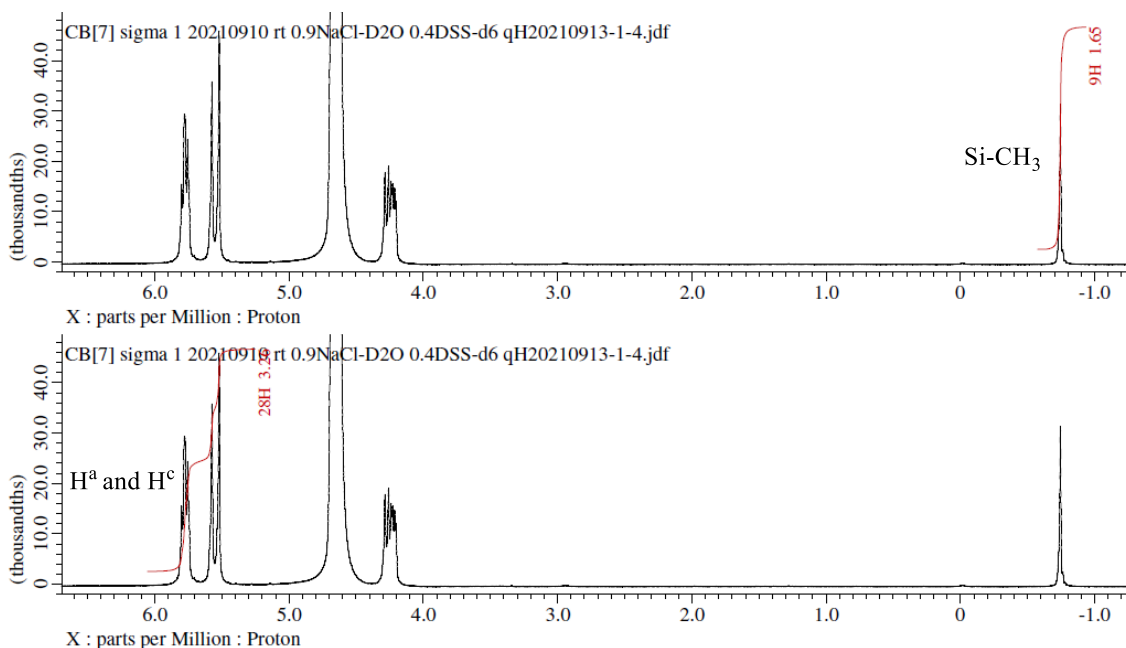

Fig. S2  $^1\text{H}$  qNMR spectra of CB[7].

The stoichiometry for the inclusion complexation of CB[7] and DQ was investigated via Job's plot by using  $^1\text{H}$  NMR measurement when the sum of the CB[7] and DQ concentrations ( $[\text{CB}[7]]$  and  $[\text{DQ}]$ ) was maintained at 1 and 10 mM; changes in the observed chemical shift ( $\Delta\delta_{\text{obs}}$ ) of the DQ  $\text{H}^4$  proton signal were used, and the stoichiometry was found from the plot of the  $\Delta\delta_{\text{obs}}*[\text{DQ}]$  as function of the ratio  $[\text{DQ}]/([\text{CB}[7]] + [\text{DQ}])$ .

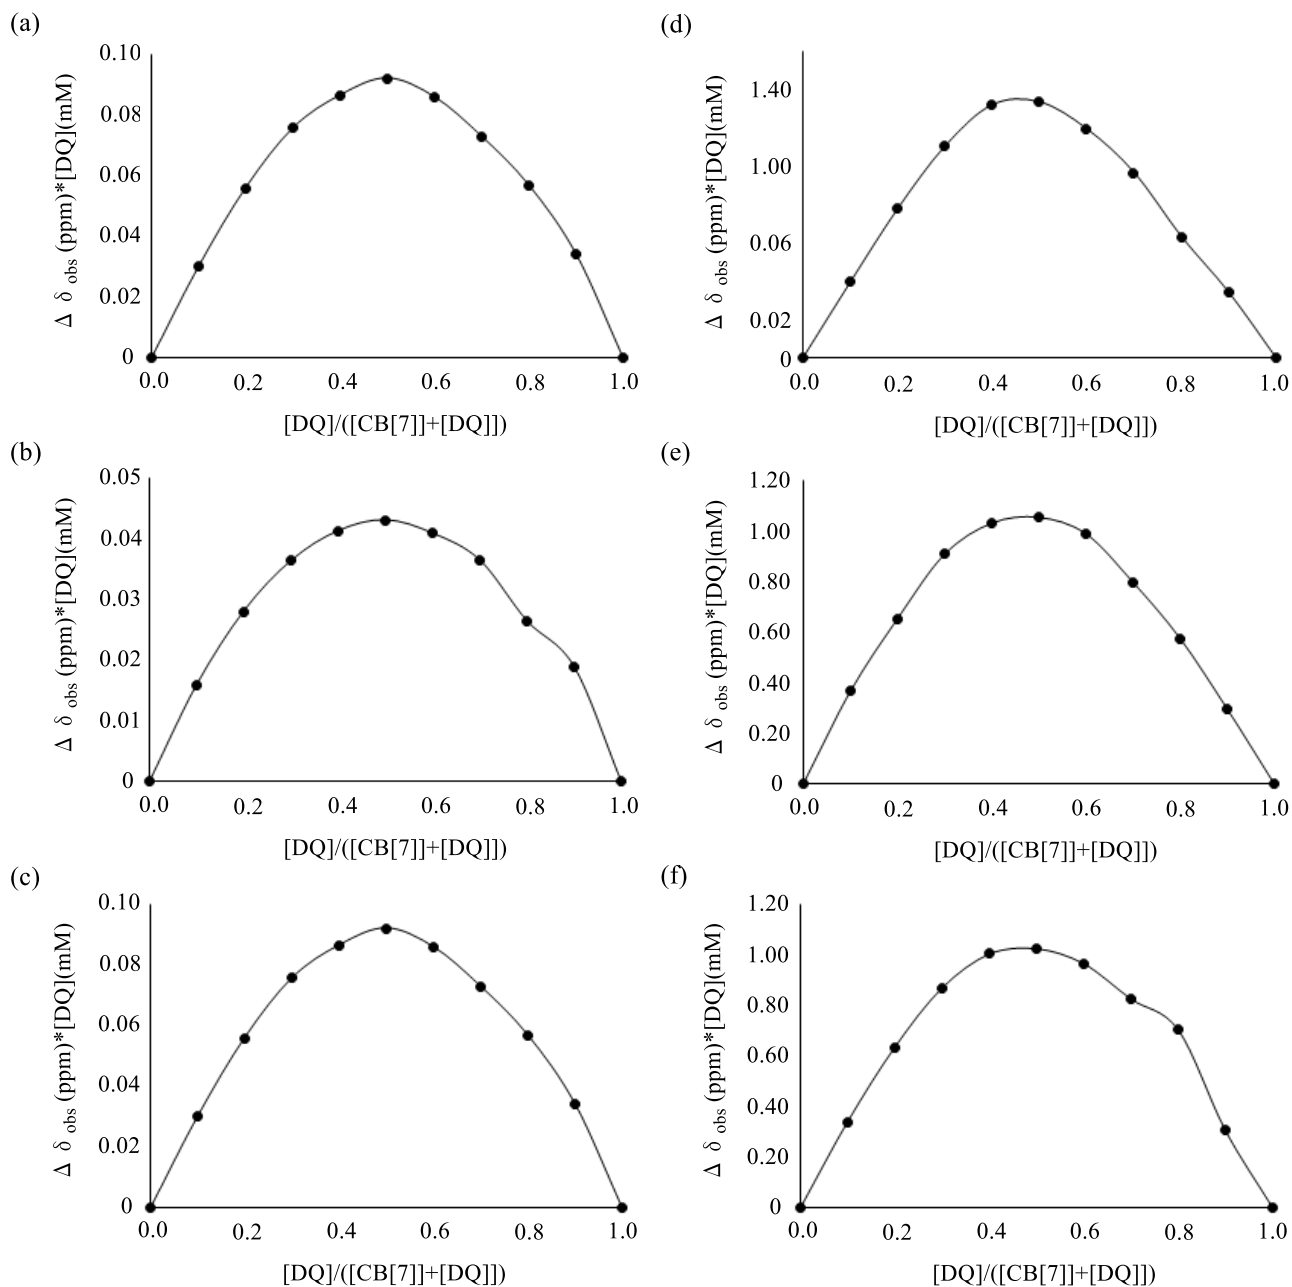

Fig. S3 Continuous variation plot (Job's plot) by using  $^1\text{H}$  NMR measurement for the inclusion complexation of CB[7] and DQ: total concentration 1 mM in (a) pD1.2, (b) pD7.4, and (c) NaCl- $\text{D}_2\text{O}$ ; total concentration 10 mM in (d) pD1.2, (e) pD7.4, and (f) NaCl- $\text{D}_2\text{O}$ .

The stoichiometry and association constant for the inclusion complexation between CB[7] and DQ were calculated via regression analysis at 30 - 65 °C in pD1.2, pD7.4, and NaCl-D<sub>2</sub>O (Fig. S3, S5, and S7) while continuously increasing the CB[7] concentration ([CB[7]]) from 0 to 5 mM in a constant concentration of DQ ([DQ]; 0.5 mM). The following Eqn (1) was used for regression analysis.  $K$  and  $n$  are, respectively, the association constant and stoichiometry of CB[7] and DQ,  $\Delta\delta_{\text{obs}}$  means ( $\delta_{\text{DQ}} - \delta_{\text{obs}}$ ),  $\Delta\delta_{\text{cx}}$  indicates ( $\delta_{\text{DQ}} - \delta_{\text{cx}}$ ), and  $\delta_{\text{DQ}}$ ,  $\delta_{\text{cx}}$ , and  $\delta_{\text{obs}}$  are the chemical shifts (in ppm) of the H<sup>4</sup> protons of, correspondingly, DQ in a free state, the CB[7]-DQ inclusion complex, and the CB[7]-DQ mixture in the <sup>1</sup>H NMR spectra. In Fig. S3, S5, and S7, m1, m2, and m3 indicate that  $\Delta\delta_{\text{cx}}$ ,  $K$ , and  $n$ , respectively. The thermodynamic parameters, that is, free energy change ( $\Delta G$ ), enthalpy change ( $\Delta H$ ), and entropy change ( $\Delta S$ ), for the inclusion complexation of CB[7] and DQ were derived from Van't Hoff plots by using association constants.

$$n \text{ CB[7]} + \text{DQ} \xrightleftharpoons{K} \text{CB[7]-DQ}$$

$$[\text{CB[7]}] = \left[ \frac{1}{\left( \frac{\Delta \delta_{\text{cx}}}{\Delta \delta_{\text{obs}}} - 1 \right) K} \right]^{1/n} + n \frac{\Delta \delta_{\text{obs}}}{\Delta \delta_{\text{cx}}} [\text{DQ}] \quad \dots \text{Eqn (1)}$$

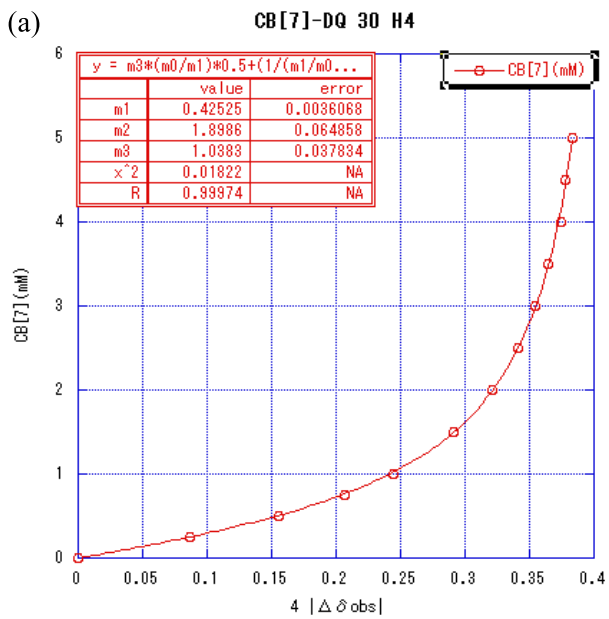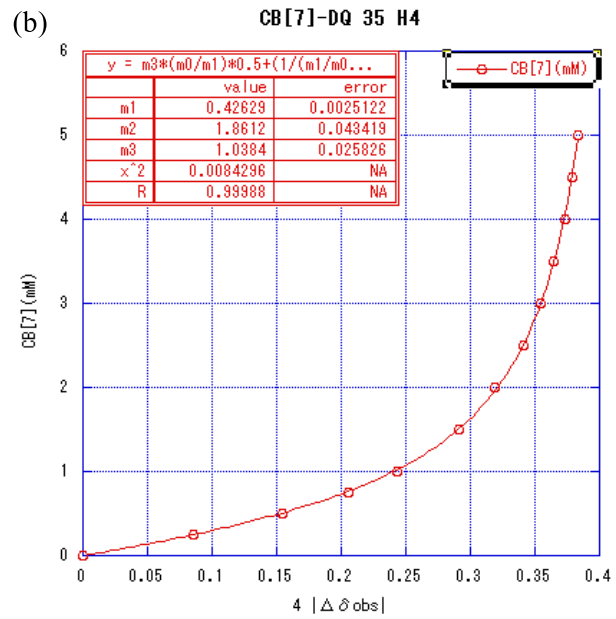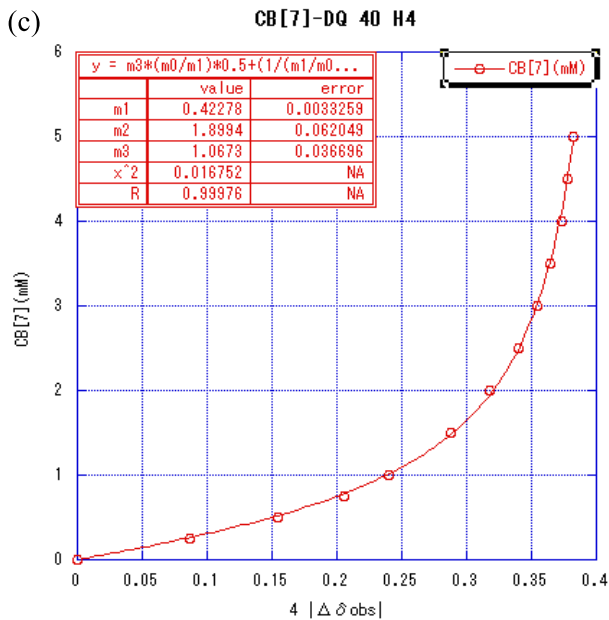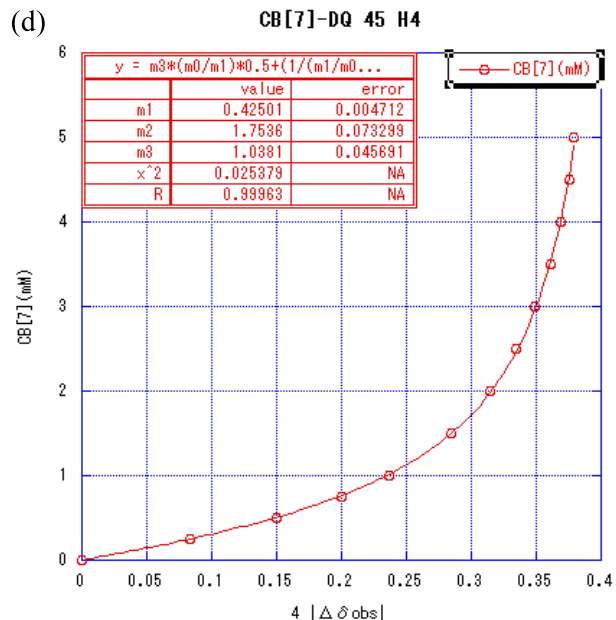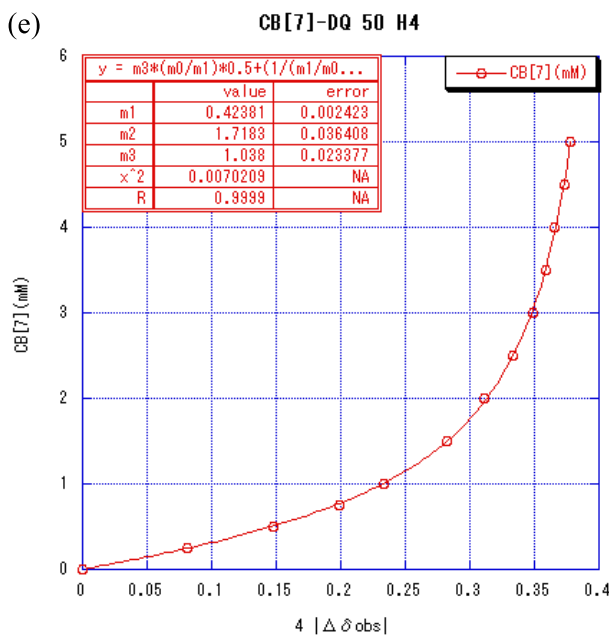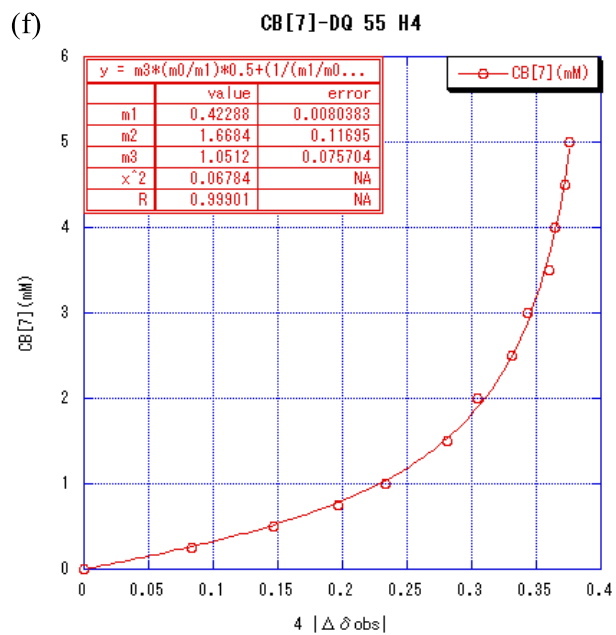

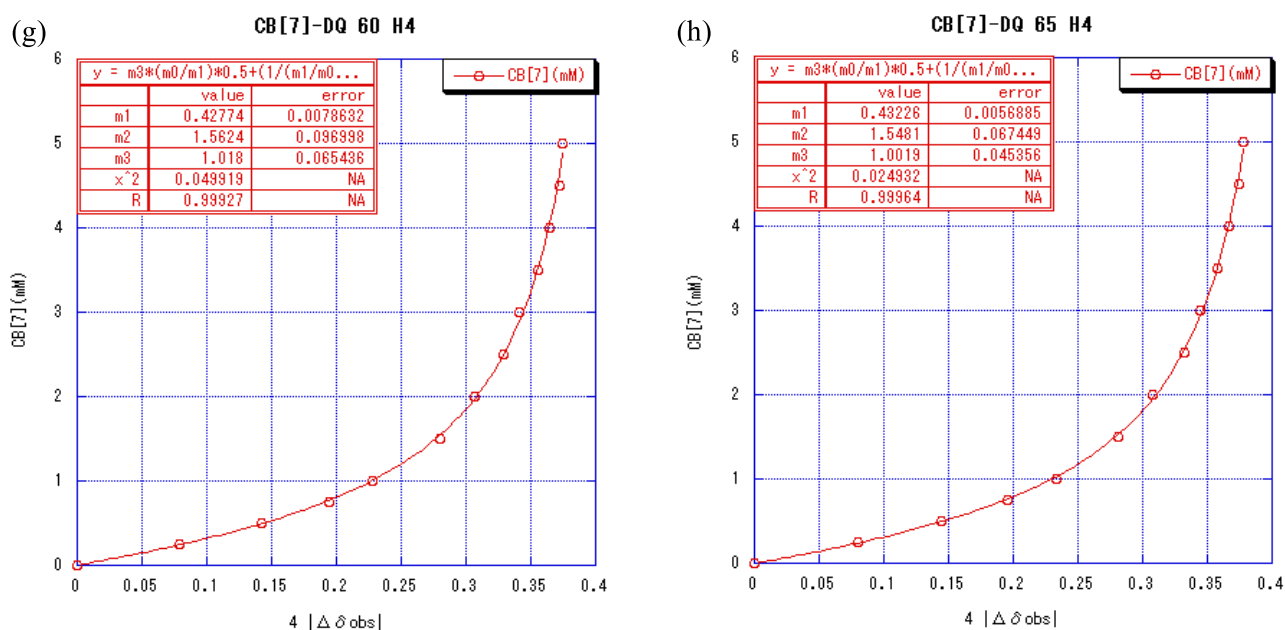

Fig. S4 Regression analysis by using Eqn (1) based on  $\Delta\delta_{\text{obs}}$  of the  $\text{H}^4$  proton signal of DQ (0.5 mM DQ) at 30 - 65 °C in pD1.2: (a) 30 °C, (b) 35 °C, (c) 40 °C, (d) 45 °C, (e) 50 °C, (f) 55 °C, (g) 60 °C, and (h) 65 °C.

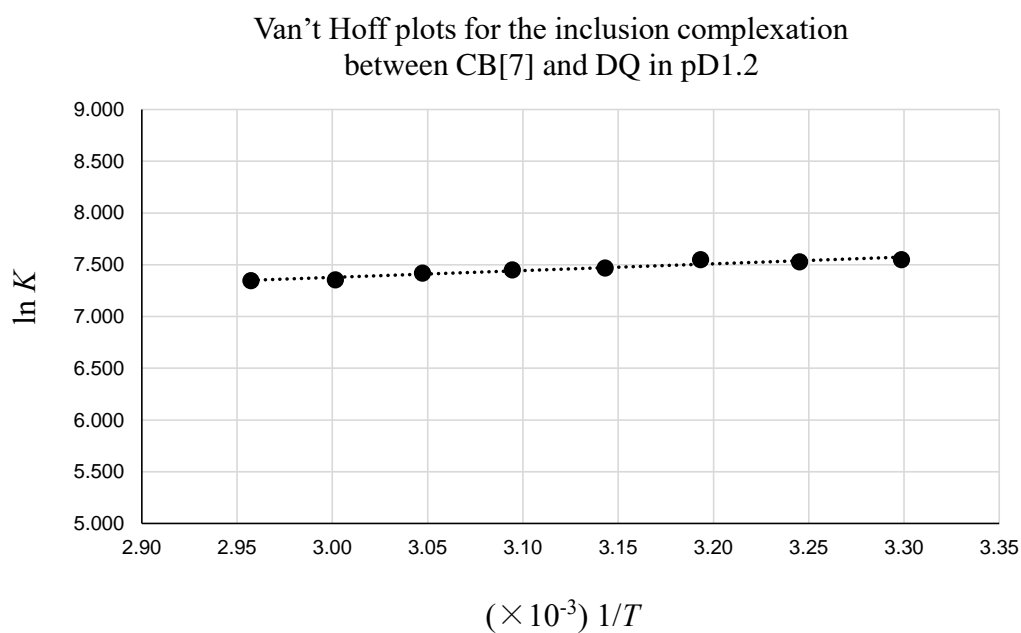

Fig. S5 Van't Hoff plots for the inclusion complexation between CB[7] and DQ (0.5 mM DQ) in pD1.2.

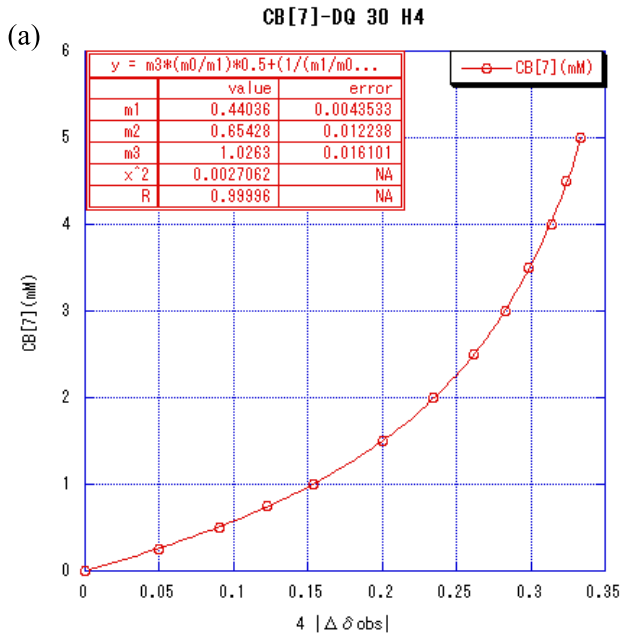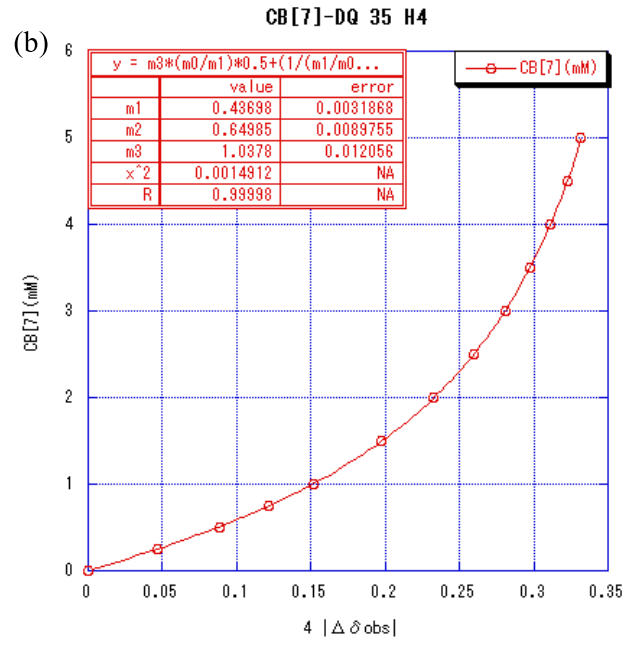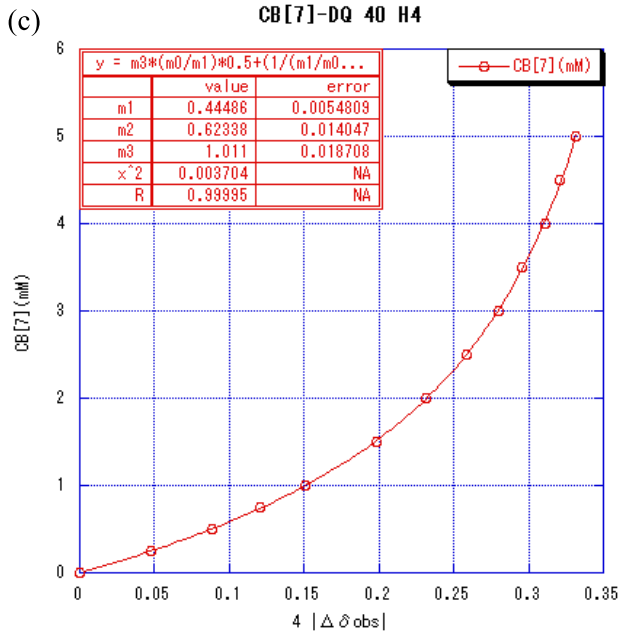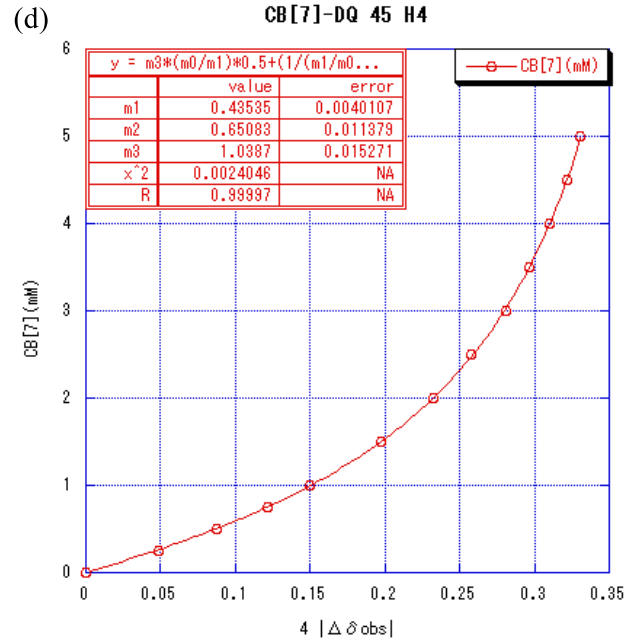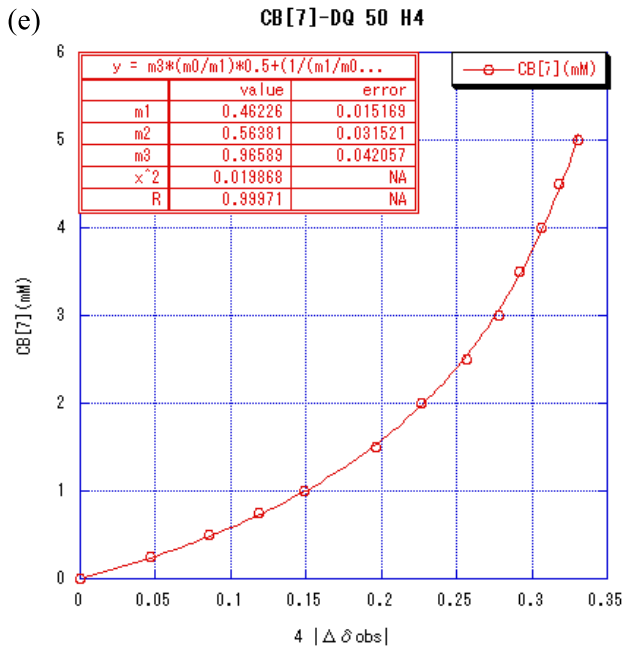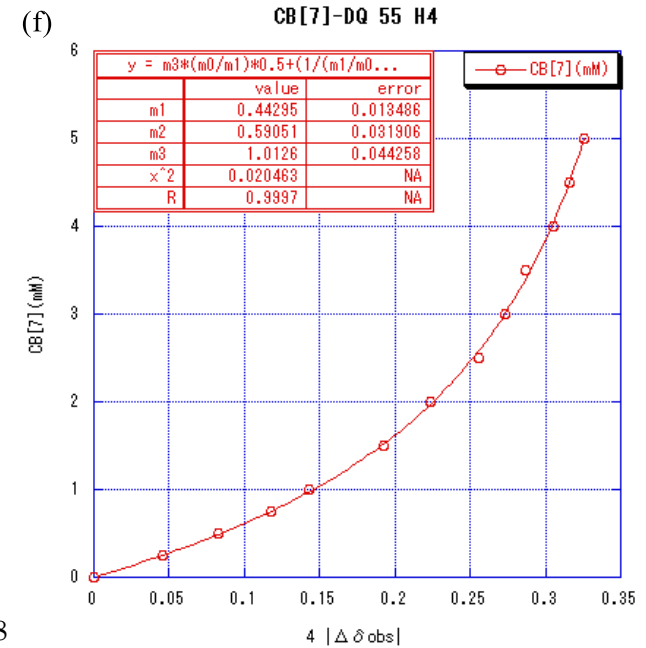

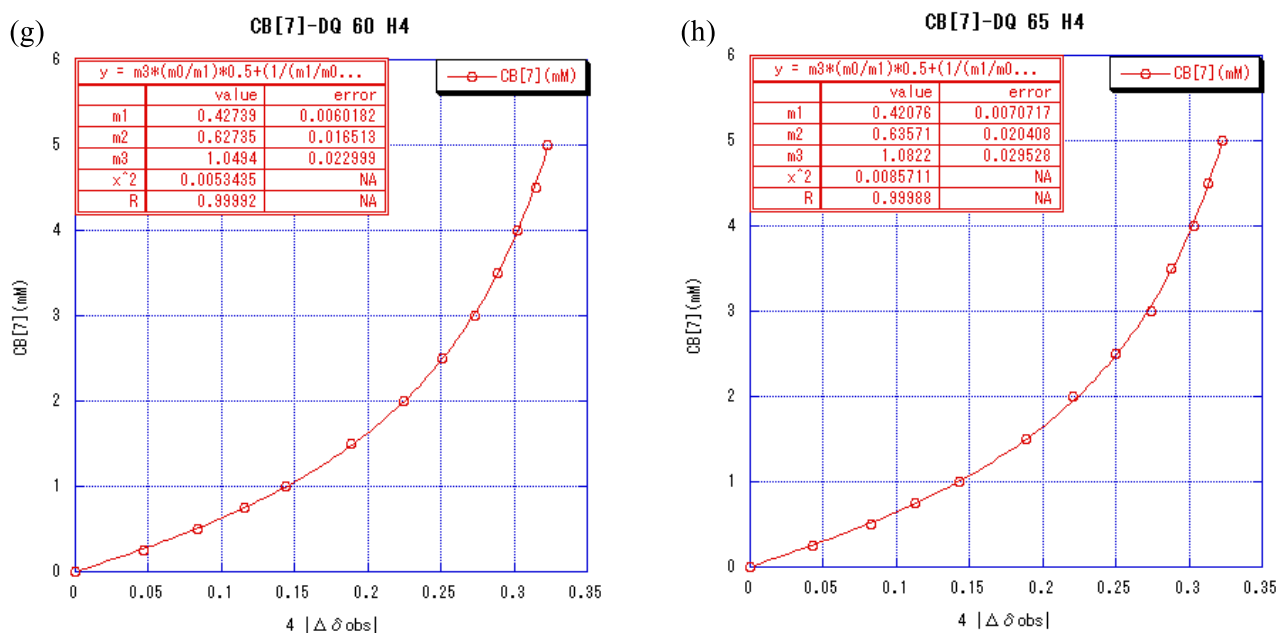

Fig. S6 Regression analysis by using Eqn (1) based on  $\Delta\delta_{\text{obs}}$  of the  $\text{H}^4$  proton signal of DQ (0.5 mM DQ) at 30 - 65 °C in pD7.4: (a) 30 °C, (b) 35 °C, (c) 40 °C, (d) 45 °C, (e) 50 °C, (f) 55 °C, (g) 60 °C, and (h) 65 °C.

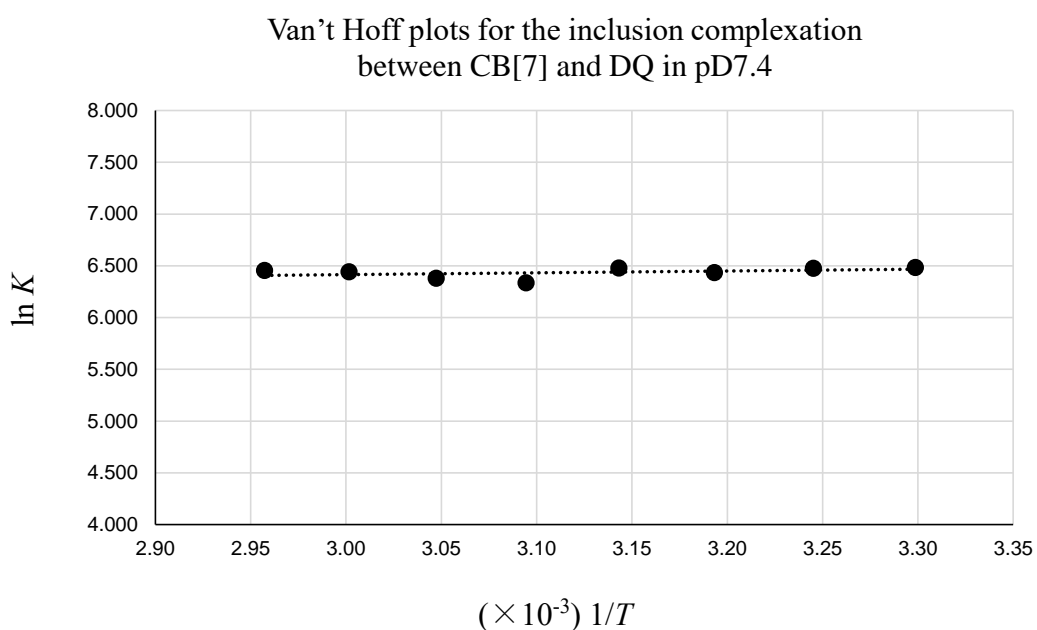

Fig. S7 Van't Hoff plots for the inclusion complexation between CB[7] and DQ (0.5 mM DQ) in pD7.4.

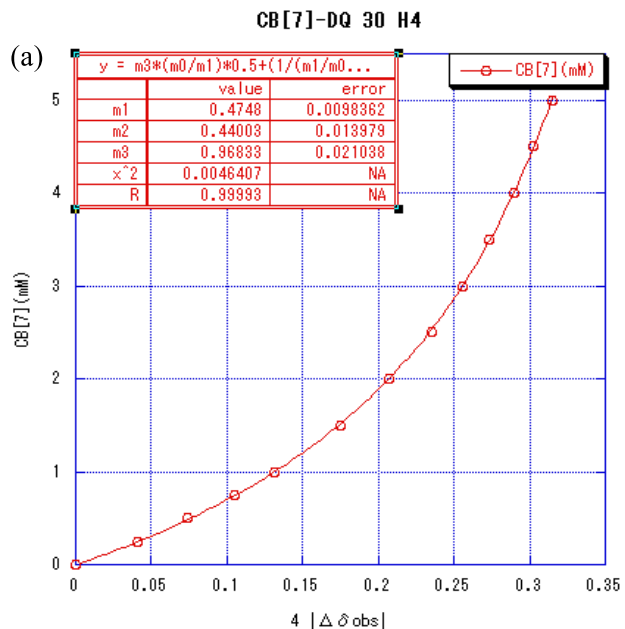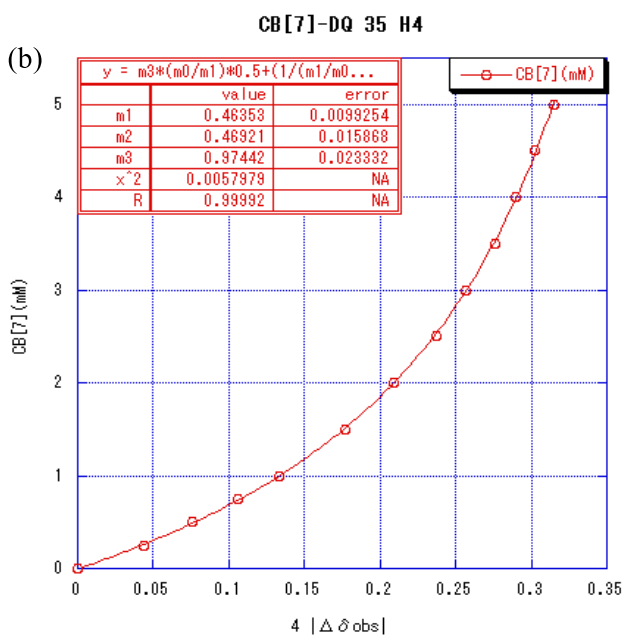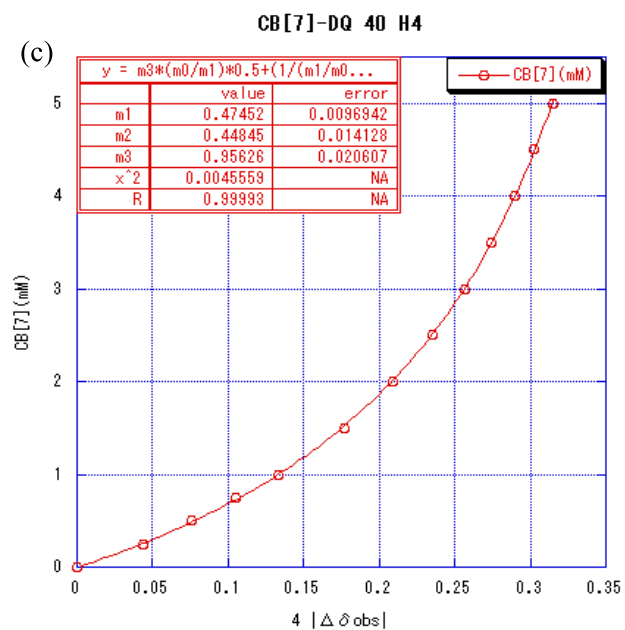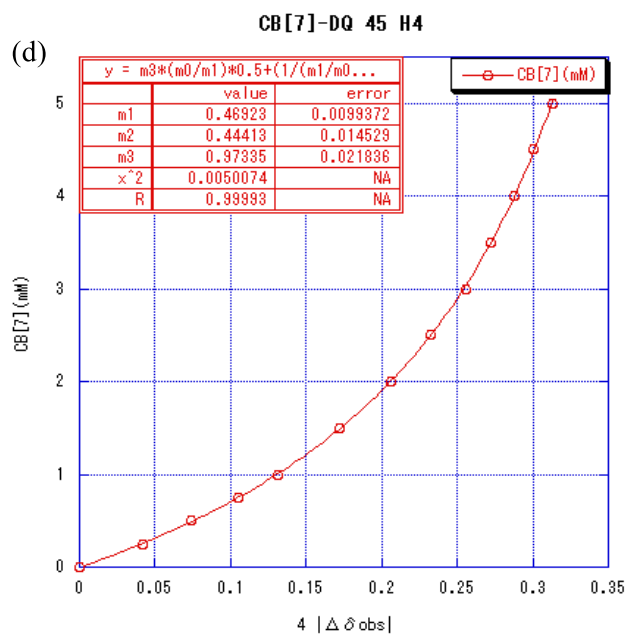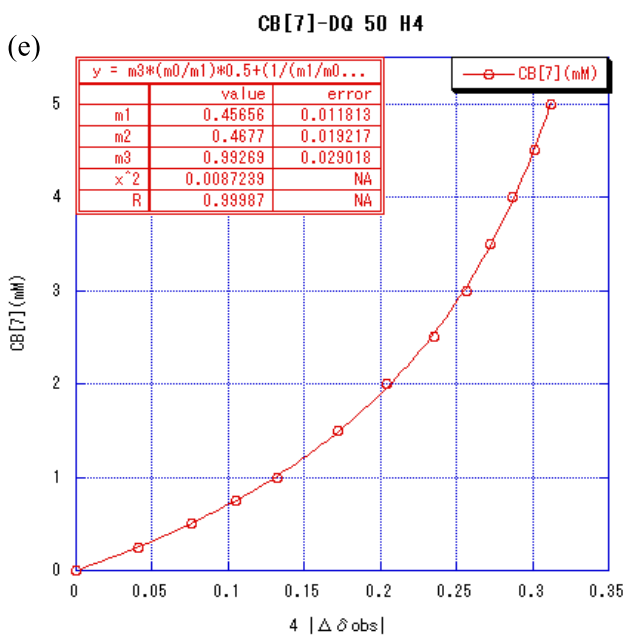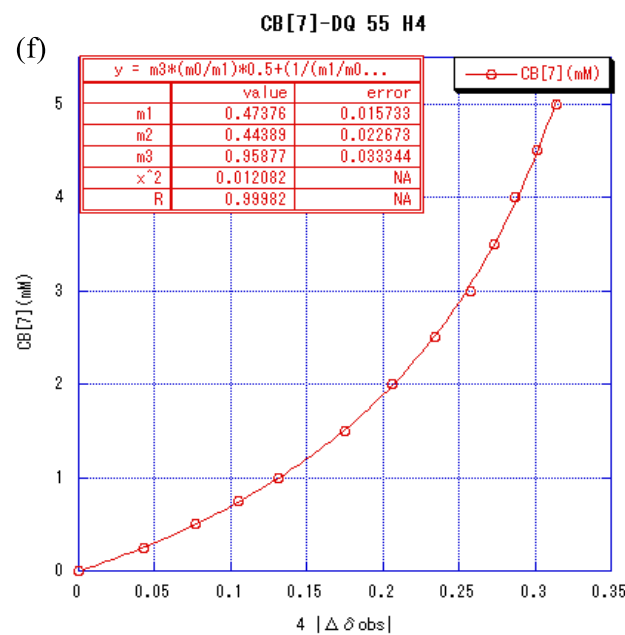

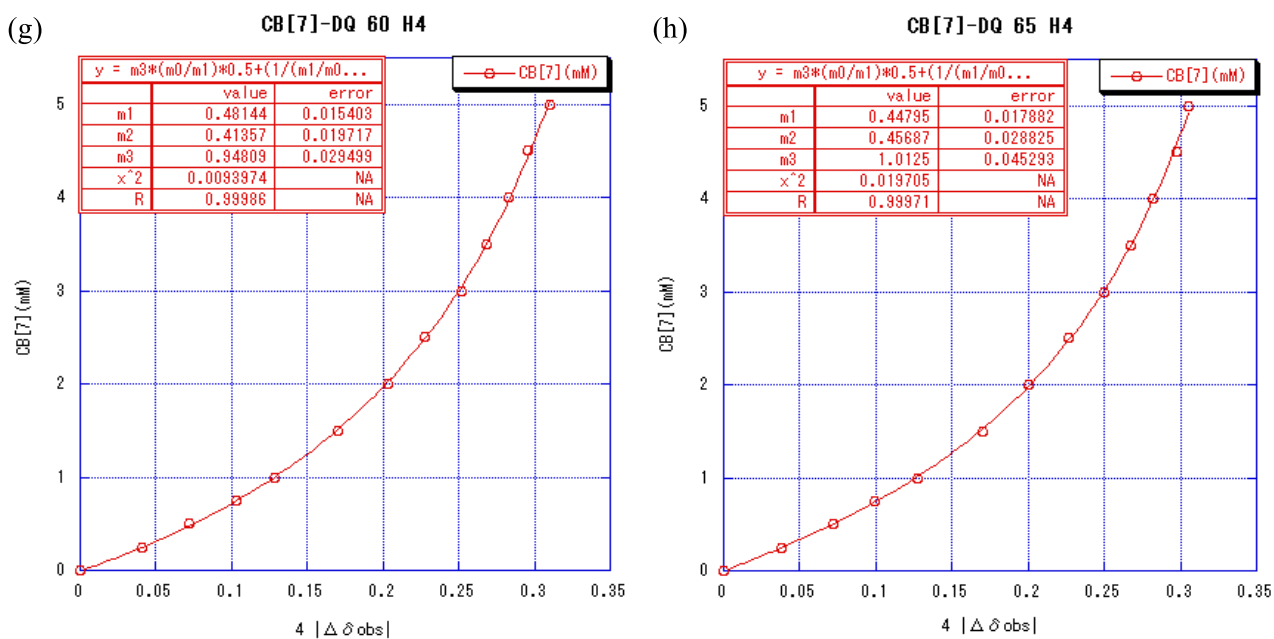

Fig. S8 Regression analysis by using Eqn (1) based on  $\Delta\delta_{\text{obs}}$  of the  $\text{H}^4$  proton signal of DQ (0.5 mM DQ) at 30 – 65 °C in NaCl- $\text{D}_2\text{O}$ : (a) 30 °C, (b) 35 °C, (c) 40 °C, (d) 45 °C, (e) 50 °C, (f) 55 °C, (g) 60 °C, and (h) 65 °C.

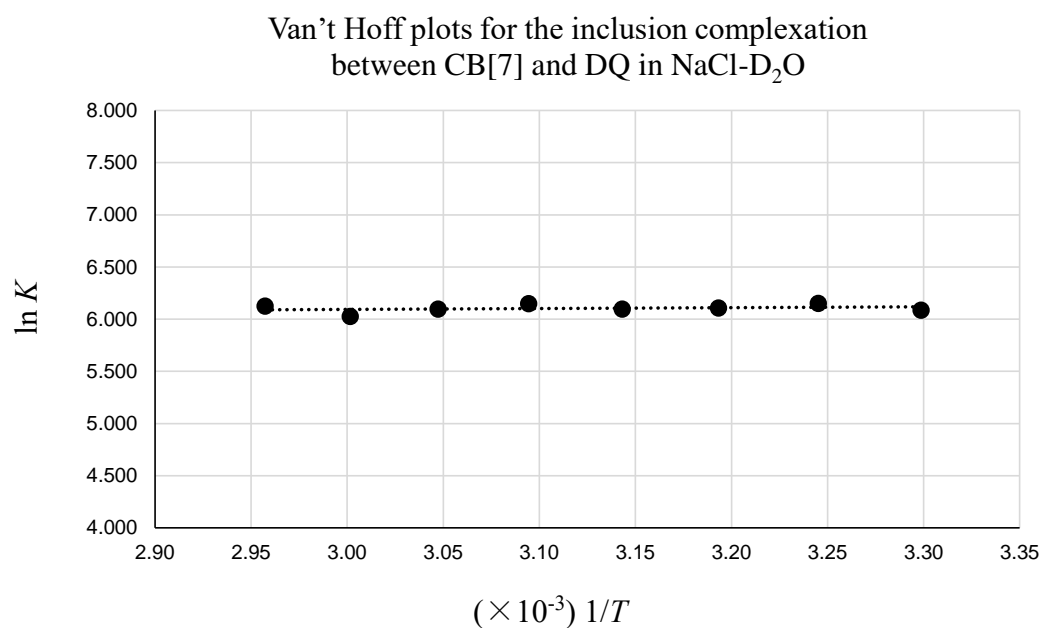

Fig. S9 Van't Hoff plots for the inclusion complexation between CB[7] and DQ (0.5 mM DQ) in NaCl- $\text{D}_2\text{O}$ .

The association constant for the inclusion complexation of CB[7] and DQ was calculated via Benesi-Hildebrand method in pD1.2, pD7.4, and NaCl-D<sub>2</sub>O while continuously increasing the CB[7] concentration ([CB[7]]) from 0 to 5 mM in a constant concentration of DQ ([DQ]; 0.05 mM). The UV spectroscopy was conducted by using a UVmini-1240 (SHIMADZU, Japan); the absorbance was recorded at 330 nm and 35 °C. The following Eqn (2) was used for regression analysis.  $K$  is the association constant of CB[7] and DQ,  $\Delta E$  means ( $A_{\text{obs}} - A_{\text{DQ}}$ ),  $\Delta \varepsilon$  indicates ( $\varepsilon_{\text{complex}} - \varepsilon_{\text{DQ}}$ ), and  $A_{\text{obs}}$  and  $A_{\text{DQ}}$ ,  $\varepsilon_{\text{complex}}$  and  $\varepsilon_{\text{DQ}}$  are the absorbance of CB[7]-DQ mixture and DQ in a free state, and the molar absorption coefficient of the CB[7]-DQ inclusion complex and DQ in a free state.

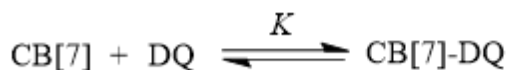

$$\frac{1}{\Delta E} = \frac{1}{K \Delta \varepsilon [\text{DQ}][\text{CB[7]}]} + \frac{1}{\Delta \varepsilon [\text{DQ}]} \dots \text{Eqn (2)}$$

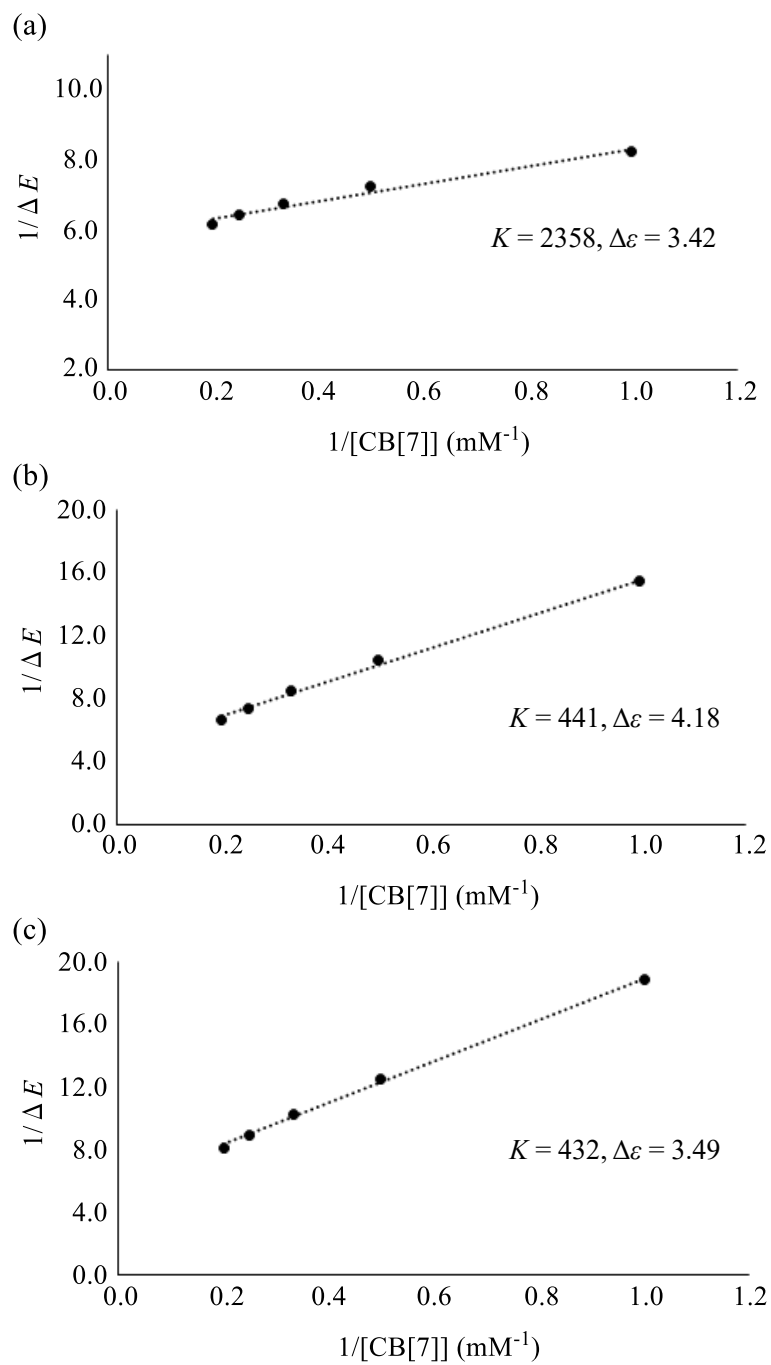

Fig. S10 Regression analysis by using Eqn (2) based on  $\Delta E$  at 35 °C in (a) pD1.2, (b) pD7.4, and (c) NaCl-D<sub>2</sub>O.

The  $n$  and  $K$  for the complexation between CB[7] and DQ were calculated via regression analysis by using Eqn (1) at 30 - 65 °C in NaCl-D<sub>2</sub>O. The CB[7] concentration continuously was increased from 0 to 10 mM in a constant concentration (1 mM DQ). The  $\Delta G$ ,  $\Delta H$ , and  $\Delta S$  for the inclusion complexation of CB[7] and DQ were derived from Van't Hoff plots by using association constants. The association constant at 35 °C was 484 M<sup>-1</sup>, and  $\Delta G$ ,  $\Delta H$ , and  $T\Delta S$  were -15.8 kJ/mol, -1.1 kJ/mol and -14.7 kJ/mol, respectively.

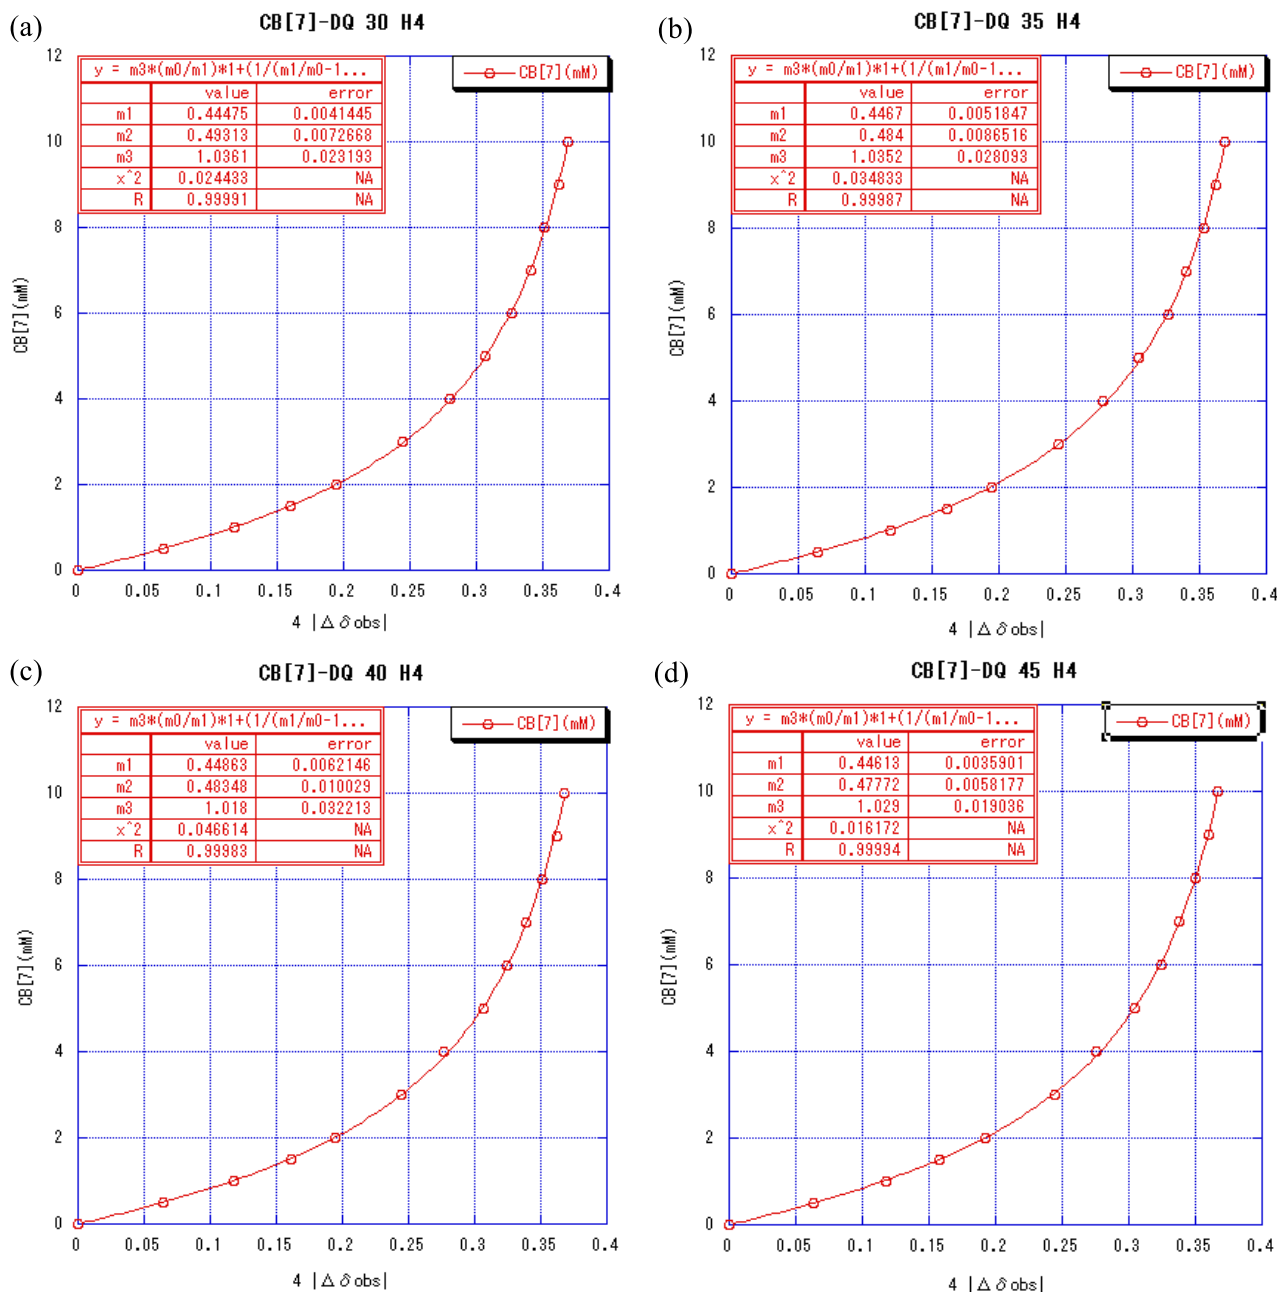

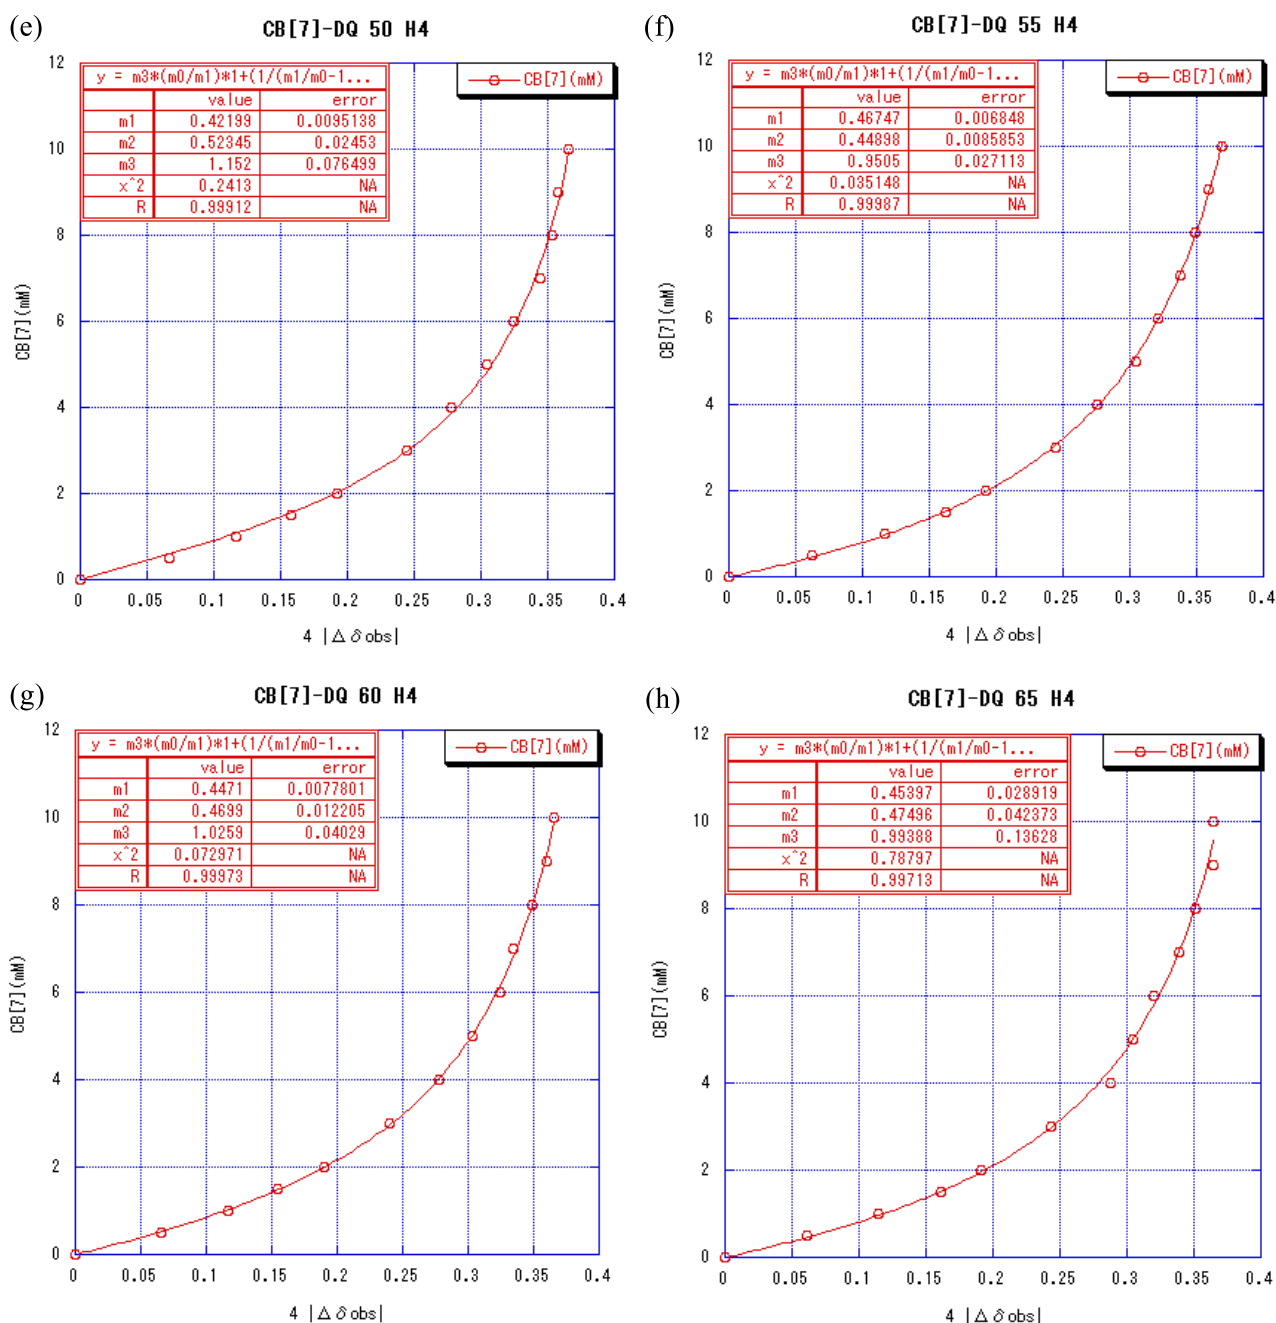

Fig. S11 Regression analysis by using Eqn (1) based on  $\Delta\delta_{\text{obs}}$  of the H<sup>4</sup> proton signal of DQ (1 mM DQ) at 30 - 65 °C in NaCl-D<sub>2</sub>O: (a) 30 °C, (b) 35 °C, (c) 40 °C, (d) 45 °C, (e) 50 °C, (f) 55 °C, (g) 60 °C, and (h) 65 °C.

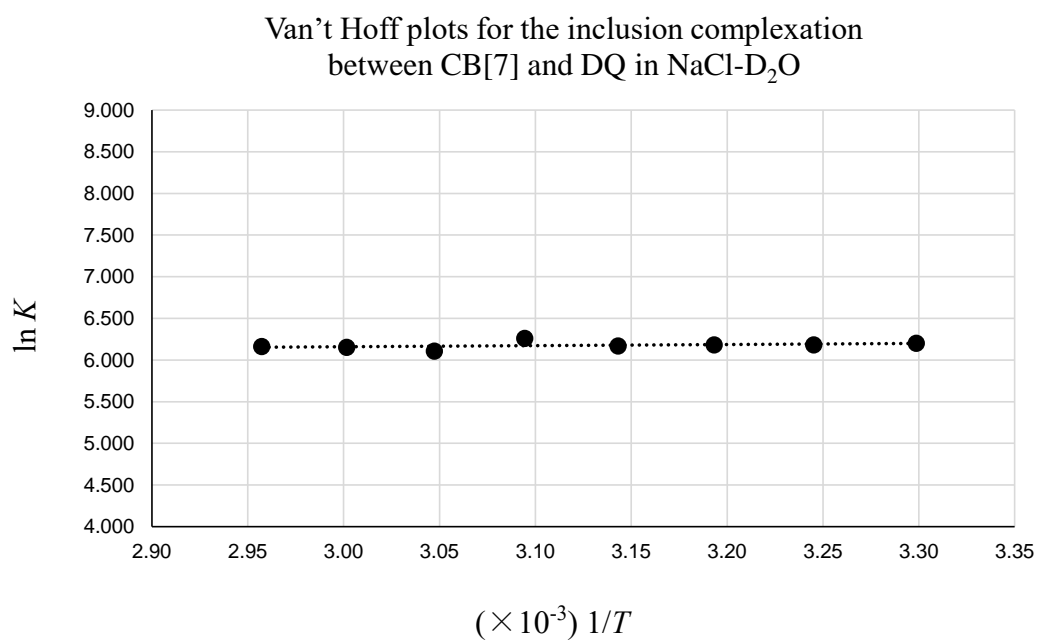

Fig. S12 Van't Hoff plots for the inclusion complexation between CB[7] and DQ (1 mM DQ) in NaCl-D<sub>2</sub>O.

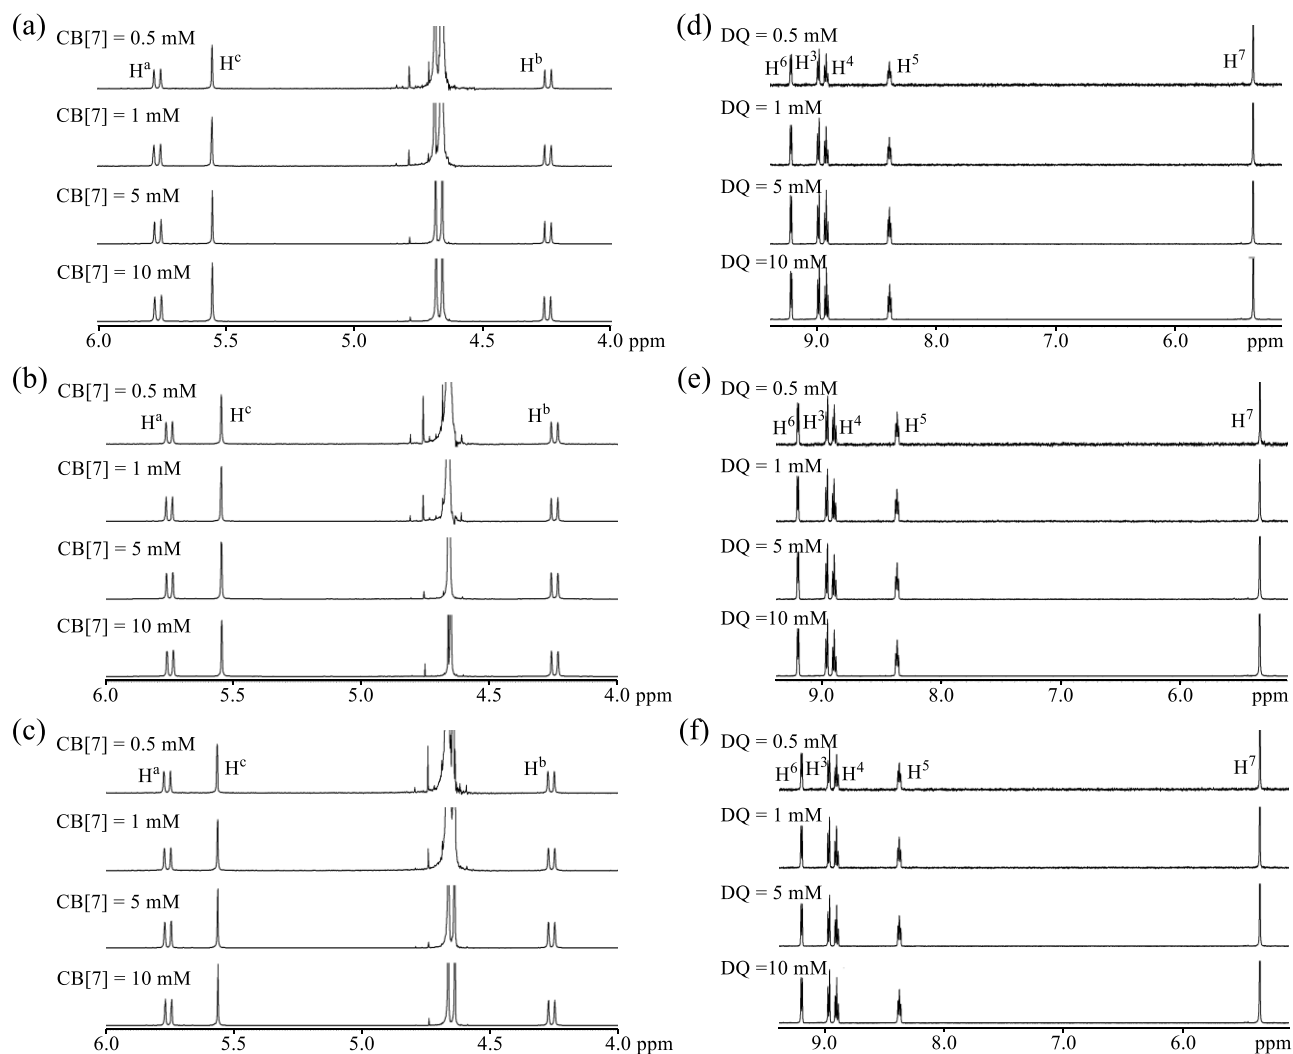

Fig. S13 Behavior of CB[7] or DQ, as revealed via  $^1\text{H}$  NMR when increasing the CB[7] or DQ concentrations in pD1.2, pD7.4, and NaCl-D<sub>2</sub>O: CB[7] in (a) pD1.2, (b) pD7.4, and (c) NaCl-D<sub>2</sub>O; DQ in (d) pD1.2, (e) pD7.4, and (f) NaCl-D<sub>2</sub>O.  $\text{H}^a$ ,  $\text{H}^b$ , and  $\text{H}^c$  indicate the proton signals of CB[7].  $\text{H}^3$ ,  $\text{H}^4$ ,  $\text{H}^5$ , and  $\text{H}^6$  indicate the proton signals of DQ.

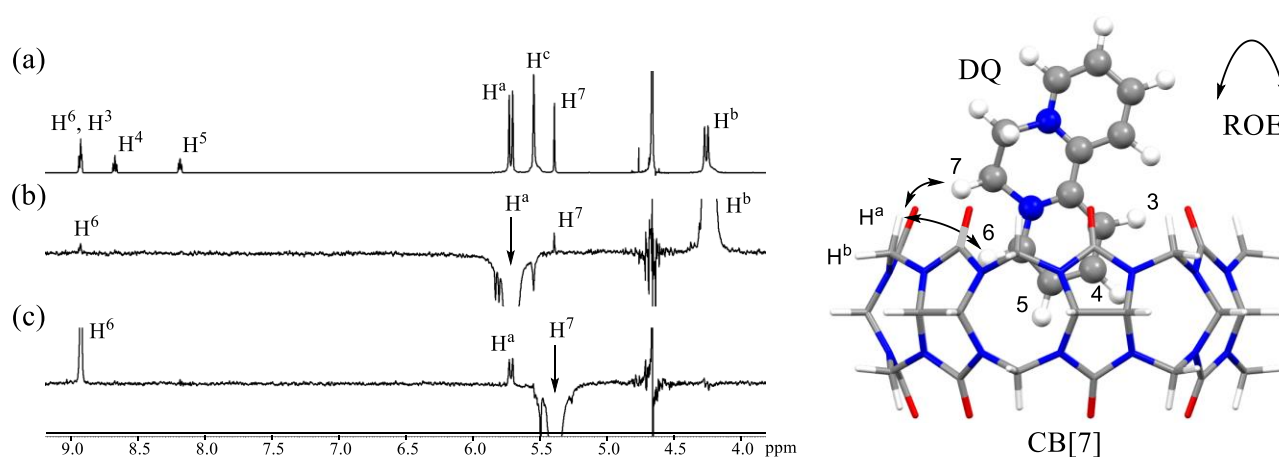

Fig. S14 Rotating-frame Overhauser effect (ROE) observed between CB[7] and DQ when forming the inclusion complex in pD7.4: (a)  $^1\text{H}$  NMR spectrum of CB[7] and DQ; (b) one-dimensional (1D) ROESY spectrum irradiated to the  $\text{H}^a$  proton of CB[7]; (c) 1D ROESY spectrum irradiated to the  $\text{H}^7$  proton of DQ. The half-arrows in 1D ROESY spectra indicate positions of the irradiated proton signals.

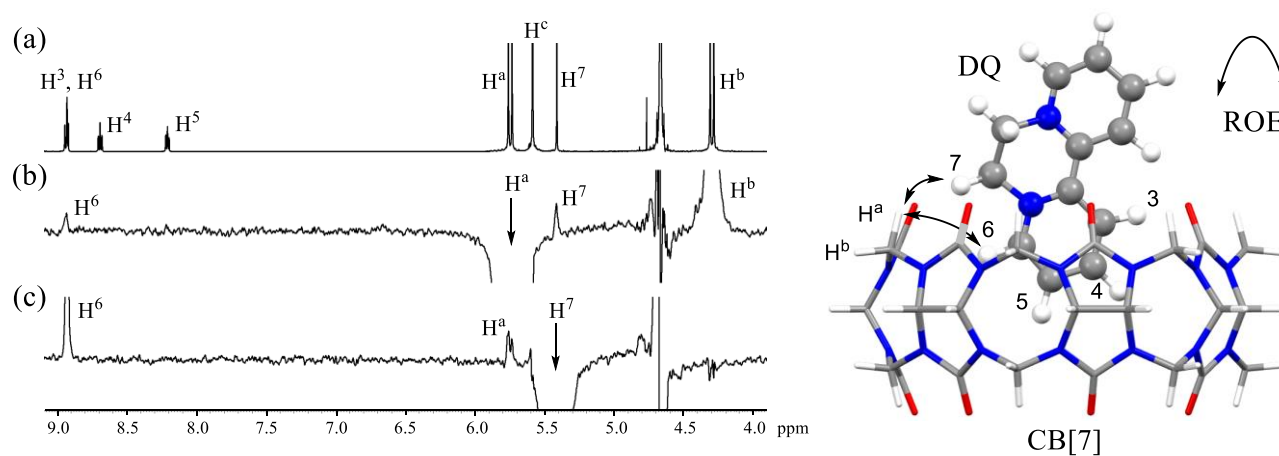

Fig. S15 ROE observed between CB[7] and DQ when forming the inclusion complex in NaCl- $\text{D}_2\text{O}$ : (a)  $^1\text{H}$  NMR spectrum of CB[7] and DQ; (b) 1D ROESY spectrum irradiated to the  $\text{H}^a$  proton of CB[7]; (c) 1D ROESY spectrum irradiated to the  $\text{H}^7$  proton of DQ. The half-arrows in 1D ROESY spectra indicate positions of the irradiated proton signals.
